# Supplementary material for: Ecological and Physicochemical Determinants of Freshwater Snail Prevalence, Density, and Schistosome Infection in the Lango Subregion, Northern Uganda: Implications for Disease Control
Source: Research Square preprint supplement (doi:10.21203/rs.3.rs-6068366/v1), 2025-02-27
Supplement: Supplementary file 1 [file 97f61925725f09fcbd7d9f12.docx]

**Additional file 2: Table S2** The frequency and percentages of categorical predictor variables used to assess the prevalence and density of freshwater intermediate host snail species in the Lango subregion, northern Uganda

| Predictor variables | Category | Dry season | | Rainy season | | Overall | |
| --- | --- | --- | --- | --- | --- | --- | --- |
|  |  | Frequency (n) | Percentage (%) | Frequency (n) | Percentage (%) | Frequency (n) | Percentage (%) |
| Snail presence | Present | 22 | 84.6 | 23 | 88.5 | 45 | 86.5 |
|  | Absent | 4 | 15.4 | 3 | 11.5 | 7 | 13.5 |
| Flow rate | > 1 m/s | 0 | 0 | 11 | 42.3 | 11 | 21.2 |
|  | 0.5-1 m/s | 7 | 26.9 | 14 | 53.8 | 21 | 40.4 |
|  | < 0.5 m/s | 15 | 57.7 | 1 | 3.8 | 16 | 30.8 |
|  | Still | 4 | 15.4 | 0 |  | 4 | 7.7 |
| Water level | Flooded | 0 | 0 | 11 | 42.3 | 11 | 21.2 |
|  | Normal | 2 | 7.7 | 14 | 53.8 | 21 | 30.8 |
|  | Low | 24 | 92.3 | 1 | 3.8 | 25 | 48.1 |
| Depth (m) | < 0.5 | 14 | 53.8 | 0 | 0 | 14 | 26.9 |
|  | 0.5-1 | 9 | 34.6 | 19 | 73.1 | 28 | 53.8 |
|  | > 1 | 3 | 11.5 | 7 | 26.9 | 10 | 19.2 |
| Substrate | Mud | 21 | 80.8 | 21 | 80.8 | 42 | 80.8 |
|  | Sand | 1 | 3.8 | 1 | 3.8 | 2 | 3.8 |
|  | Gravel | 1 | 3.8 | 1 | 3.8 | 2 | 3.8 |
|  | Rock | 2 | 7.7 | 2 | 7.7 | 4 | 7.7 |
|  | Concrete | 1 | 3.8 | 0 | 0 | 1 | 1.9 |
|  | Peat | 0 | 0 | 1 | 3.8 | 1 | 1.9 |
| Domestic animals | Cow | 24 | 92.3 | 26 | 100 | 50 | 96.2 |
|  | Pig | 1 | 3.8 | 0 | 0 | 1 | 1.9 |
|  | None | 1 | 3.8 | 0 | 0 | 1 | 1.9 |
| Wild animals | Carnivore | 1 | 3.8 | 0 | 0 | 1 | 1.9 |
|  | Water birds | 16 | 61.5 | 19 | 73.1 | 35 | 67.3 |
|  | Wild rats | 1 | 3.8 | 1 | 3.8 | 2 | 3.8 |
|  | None | 8 | 30.8 | 6 | 23.1 | 14 | 26.9 |
| Main vegetation present | Reeds | 3 | 11.5 | 3 | 11.5 | 6 | 11.5 |
|  | Grass | 7 | 26.9 | 8 | 30.8 | 15 | 28.8 |
|  | Aquatic plants | 6 | 23.1 | 5 | 19.2 | 11 | 21.2 |
|  | Verecera weeds | 7 | 26.9 | 7 | 26.9 | 14 | 26.9 |
|  | Water hyacinth | 1 | 3.8 | 1 | 3.8 | 2 | 3.8 |
|  | Rice field | 2 | 7.7 | 2 | 7.7 | 4 | 7.7 |
| Open defecation | Yes | 3 | 11.5 | 13 | 50 | 16 | 30.8 |
|  | No | 23 | 88.5 | 13 | 50 | 36 | 69.2 |
