# Supplementary material for: Ecological and Physicochemical Determinants of Freshwater Snail Prevalence, Density, and Schistosome Infection in the Lango Subregion, Northern Uganda: Implications for Disease Control
Source: Research Square preprint supplement (doi:10.21203/rs.3.rs-6068366/v1), 2025-02-27
Supplement: Supplementary file 2 [file b75837719a980ecd4f8b88c0.docx]

**Additional file 1: Table 1** Descriptive statistics for the continuous predictors variables used to assess the prevalence and density of freshwater snail intermediate host species in the Lango Subregion, northern Uganda

| Predictor variables | Dry season | | Rainy season | | Overall | |
| --- | --- | --- | --- | --- | --- | --- |
|  | Range | Mean ± SD | Range | Mean ± SD | Range | Mean ± SD |
| Temp(oc) | 26.3-34.3 | 29.05±2.04 | 27.2-34.8 | 30.91±2.32 | 26.3-34.8 | 29.98±2.36 |
| pH | 6.4-9.6 | 7.73±0.69 | 7.3-8.7 | 8.08±0.43 | 6.4-9.6 | 7.90±0.60 |
| Salinity (g/L) | 0.0-0.2 | 0.02±0.06 | 0.0-0.1 | 0.004±0.02 | 0.0-0.2 | 0.01±0.04 |
| TDS (ppm) | 59-415 | 151.54±87.87 | 42-906 | 191.38±206.29 | 42-906 | 171.46±158.27 |
| Conductivity (ms) | 0.07-0.60 | 0.20±0.12 | 0.01-1.68 | 0.35±0.39 | 0.01-1.68 | 0.27±0.29 |
| DO (mg/L) | 5.5-50.3 | 29.31±14.83 | 1.6-19.8 | 10.64±4.58 | 1.6-50.3 | 19.98±14.39 |
